# Supplementary material for: A biomimetic redox flow battery based on flavin mononucleotide
Source: PubMed Central journal article supplement (PMC5078740; doi:10.1038/ncomms13230), 2016-10-21
Supplement: ncomms13230-s1.pdf [file ncomms13230-s1.pdf]

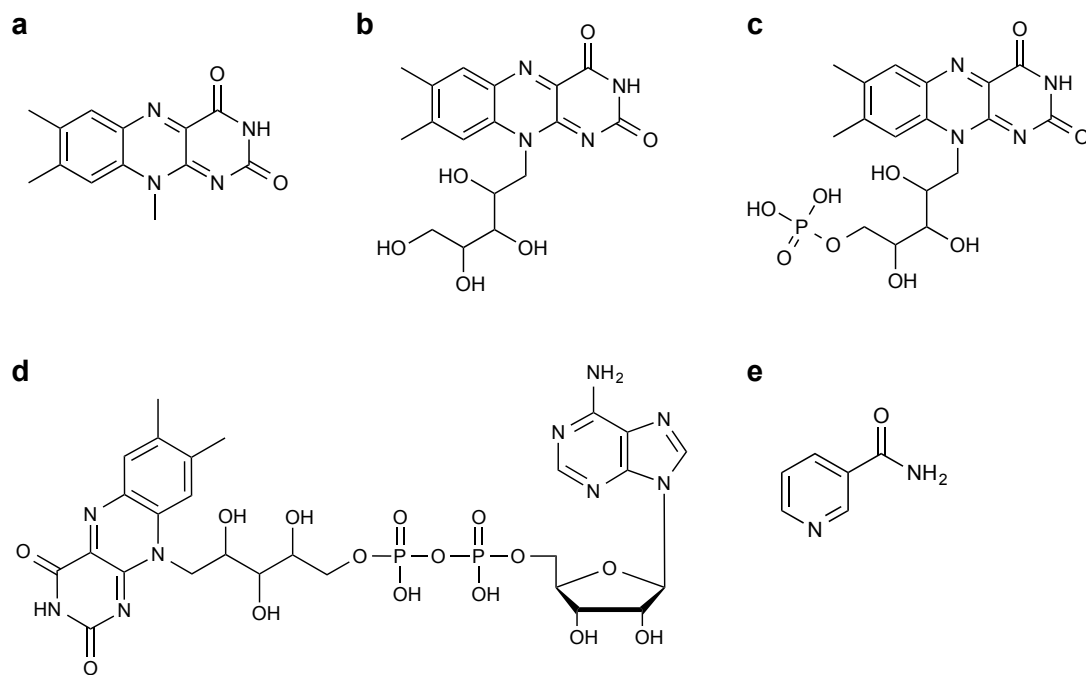

**Supplementary Figure 1 | Flavins and nicotinamide .** The molecular structures of (a) lumiflavin, (b) riboflavin, (c) flavin mononucleotide (FMN, riboflavin-5'-monophosphate), (d) flavin adenine dinucleotide (FAD), and (e) nicotinamide (pyridine-3-carboxylic acid amide).

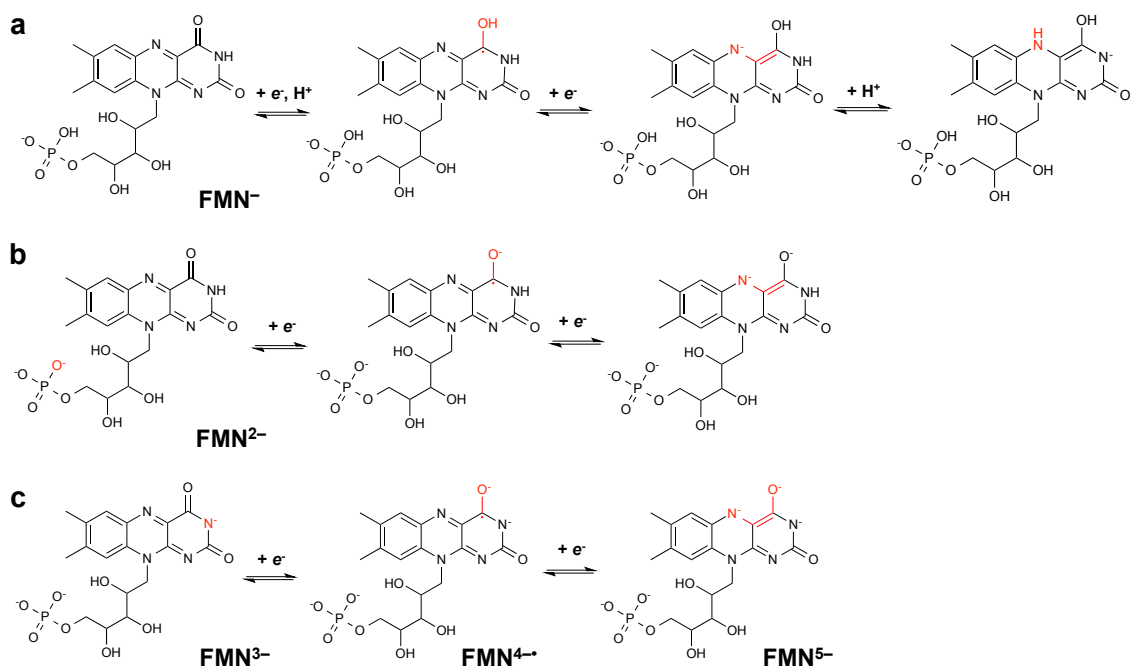

**Supplementary Figure 2 | Redox reactions of FMN-Na.** Proposed redox mechanisms of FMN-Na with different protonation states of the phosphate group and 3-position nitrogen. **(a)** pH = 5.5, **(b)** pH = 8.6, 10.0, and **(c)** pH = 13.0.

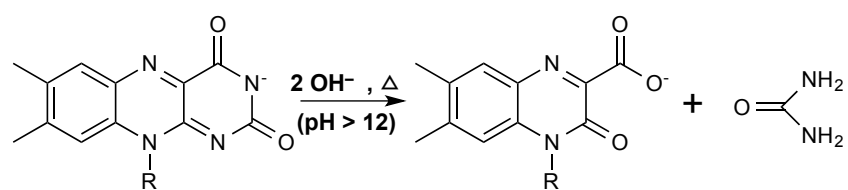

**Supplementary Figure 3 | Alkaline hydrolysis of riboflavin.**

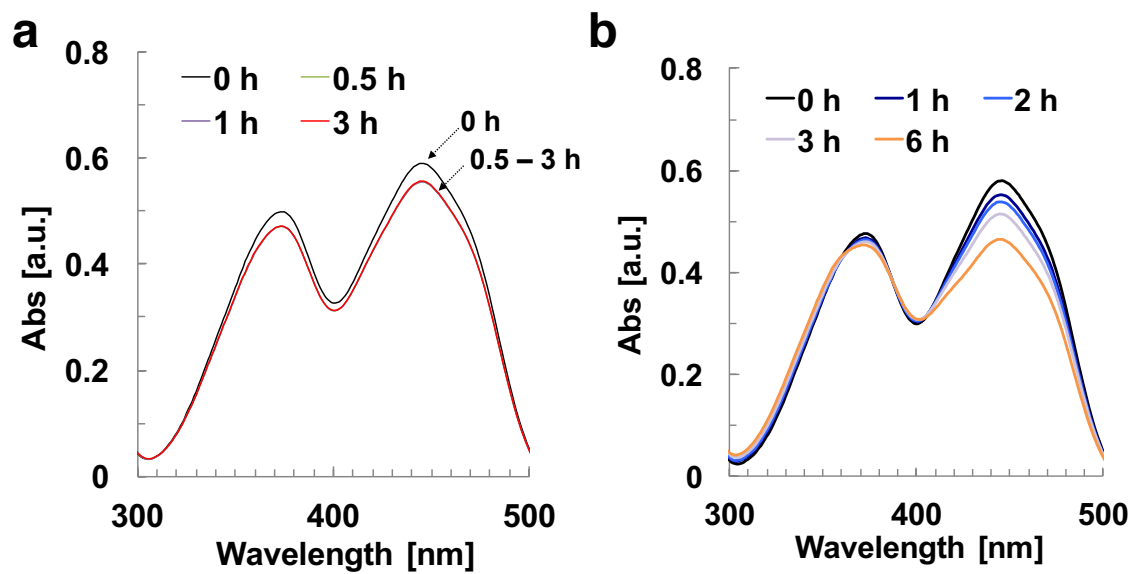

**Supplementary Figure 4 | Dimerization effect on optical characteristics.** UV-VIS spectra of (a) 50 μM FMN-Na (pH 5.5) and (b) 50 μM FMN-Na in pH 9.1 buffer (pH 8.6) aqueous solutions 0–6 h after electrolyte preparation.

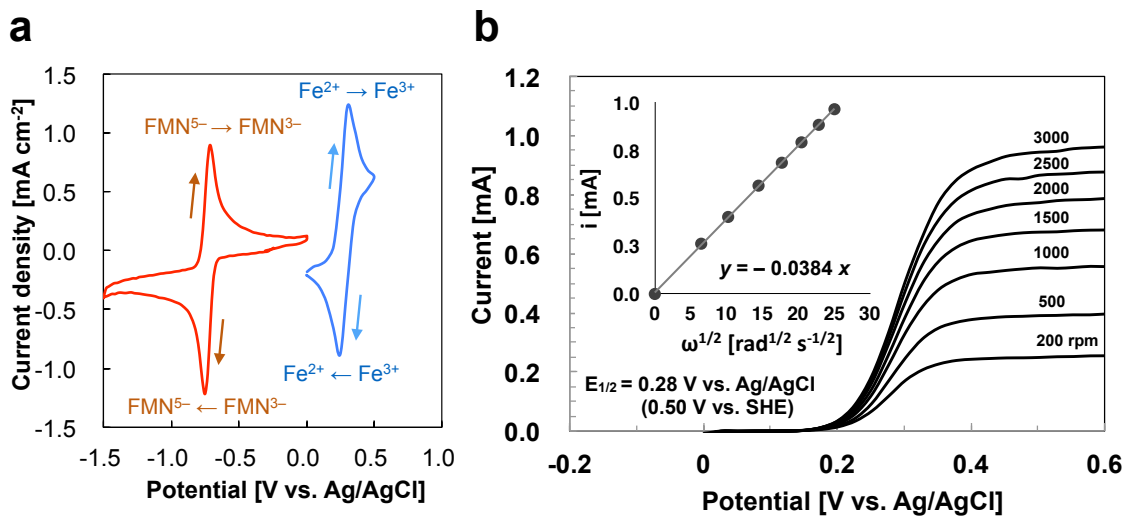

**Supplementary Figure 5 | Electrochemistry of an electrolyte.** (a) Cyclic voltammograms of 20 mM  $\text{K}_4[\text{Fe}(\text{CN})_6]$  and 1 M KOH aqueous positive electrolyte and 10 mM FMN-N and 1 M KOH aqueous negative electrolyte. (b) RDE measurements of 20 mM  $\text{K}_4[\text{Fe}(\text{CN})_6]$  and 1 M KOH aqueous positive electrolyte. The inset shows the limiting current ( $i$ ) vs. the square root of the rotation velocity (Levich-plot).

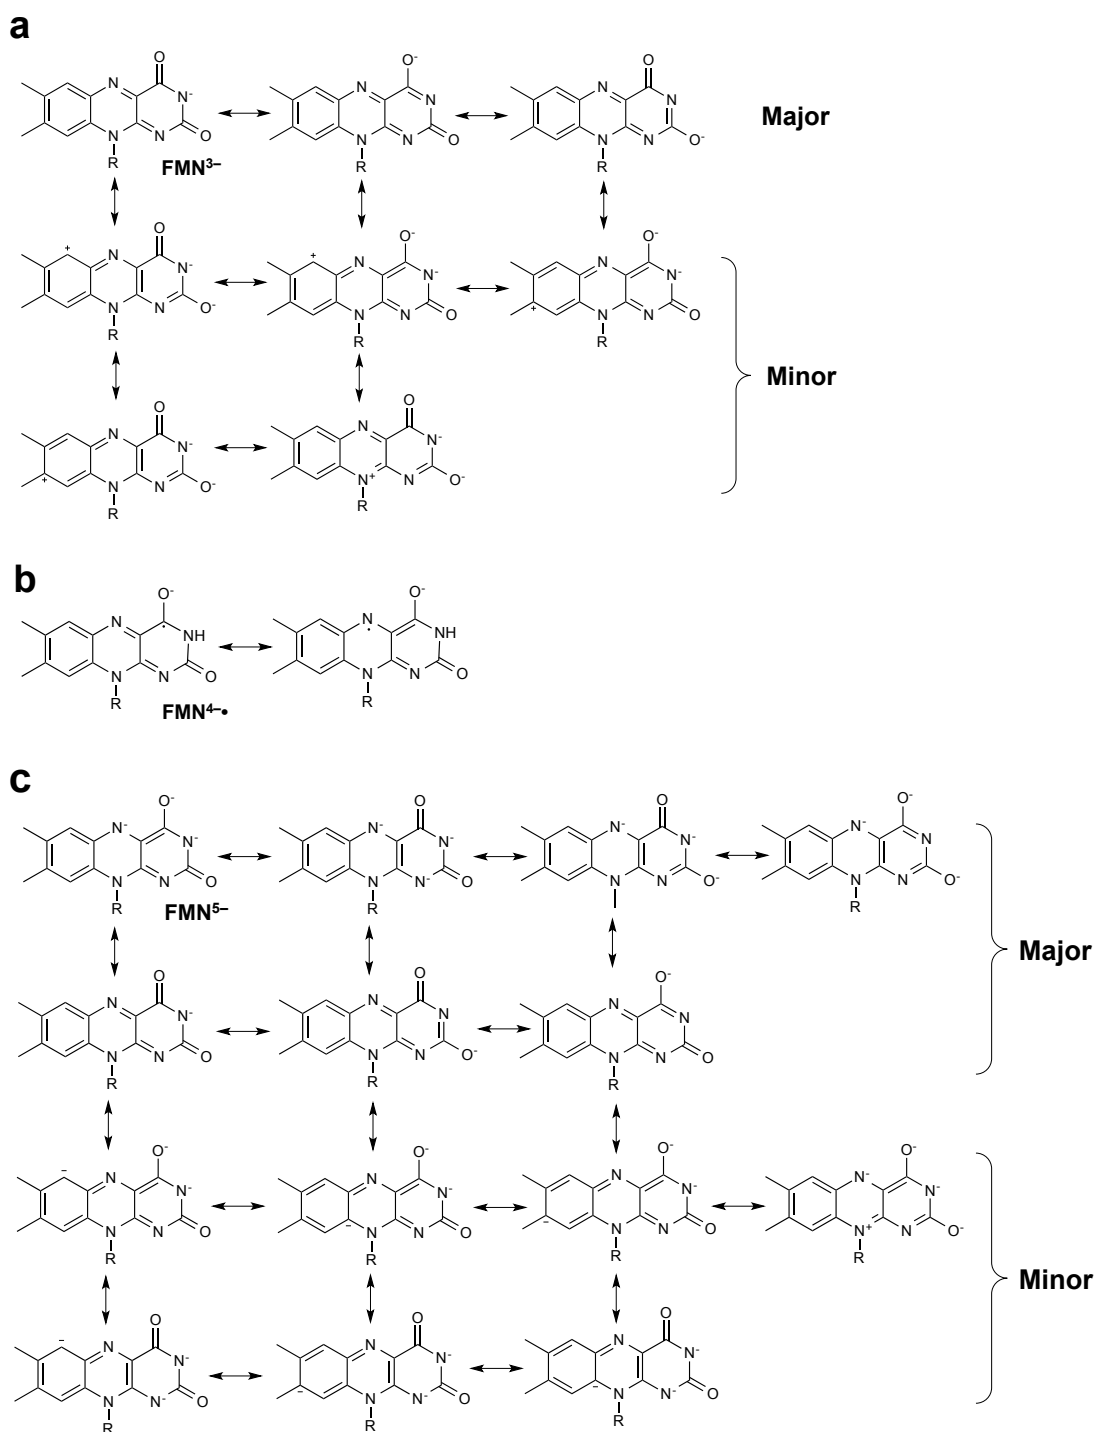

**Supplementary Figure 6 | Possible resonance structures of FMN-Na. (a) FMN<sup>3-</sup>, (b) FMN<sup>4-•</sup>, and (c) FMN<sup>5-</sup>.**

**a**

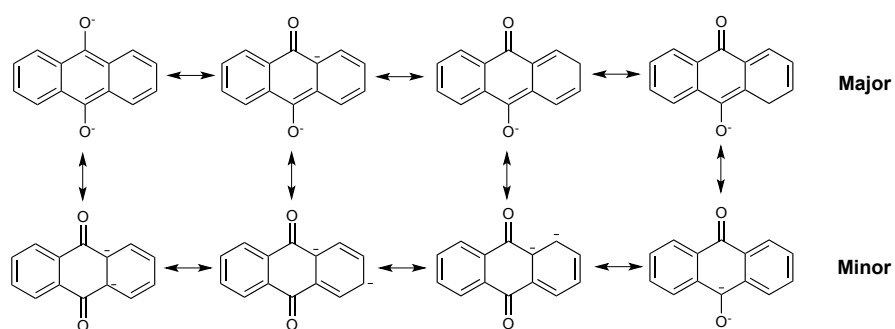

**b**

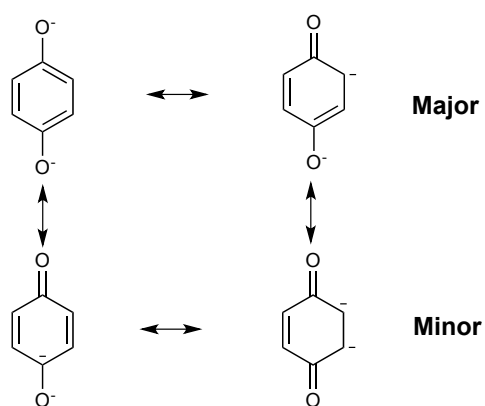

**Supplementary Figure 7 | Possible resonance structures at two-electron reduced state. (a) Anthraquinone and (b) *p*-benzoquinone.**

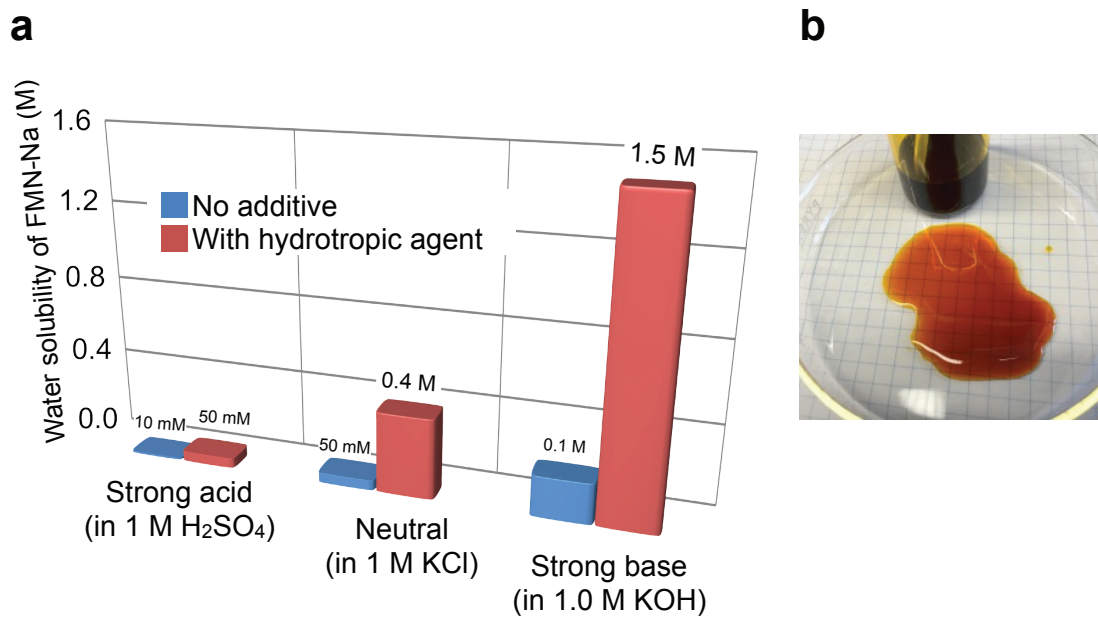

**Supplementary Figure 8 | The effect of nicotinamide on water solubility of FMN-Na.** (a) Water solubilities of FMN-Na in 1 M H<sub>2</sub>SO<sub>4</sub>, KCl, and KOH with and without 3 M nicotinamide (NA) at 288 K. (b) The picture of an aqueous electrolyte consisting of 1.5 M FMN-Na, 3.0 M NA, and 1.0 M KOH.



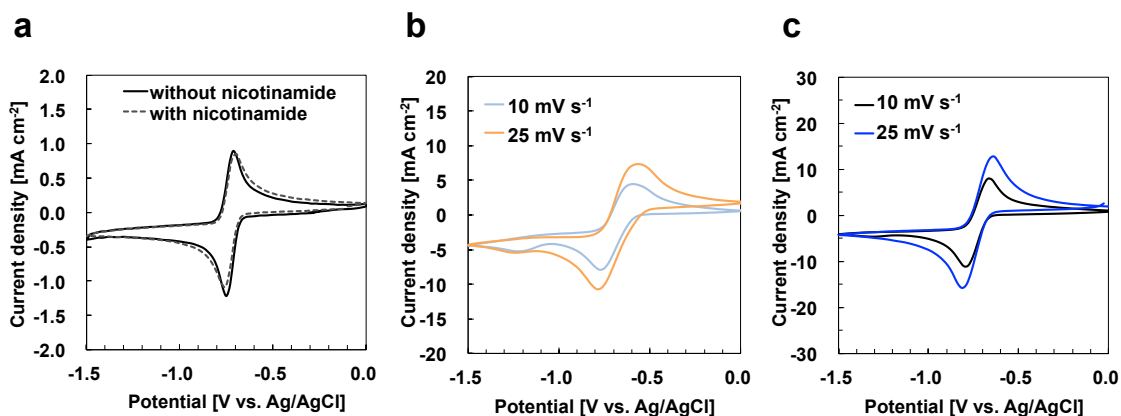

**Supplementary Figure 9 | Electrochemistry of FMN-Na electrolytes with and without nicotinamide (NA).** (a) Cyclic voltammograms (CVs) of 10 mM FMN-Na and 1 M KOH aqueous electrolytes with and without 10 mM NA at a sweep rate of 10 mV s<sup>-1</sup>. (b,c) CVs of 0.24 M FMN-Na, 1 M NA, and 1 M KOH aqueous electrolyte at a sweep rate of 10 and 25 mV s<sup>-1</sup>. CVs in (a) and (c) were measured immediately after electrolyte preparation. CV in (b) was measured 100 h after electrolyte preparation.

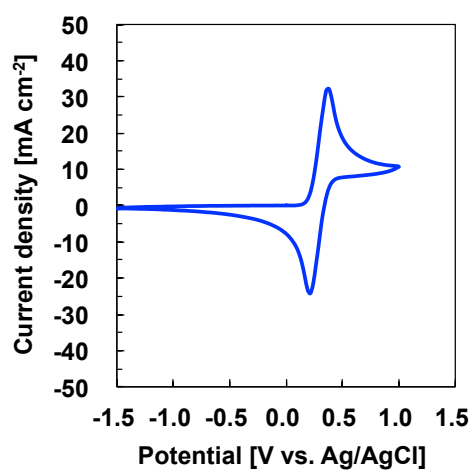

**Supplementary Figure 10 | Electrochemistry of a positive electrolyte after 200 cycles.** Cyclic voltammogram (CV) of 0.4 M  $\text{K}_4[\text{Fe}(\text{CN})_6]$  and 1 M KOH aqueous electrolyte at a sweep rate of  $25 \text{ mV s}^{-1}$ .

**Supplementary Table 1 | Kinetic parameters of redox couples in aqueous solutions.**

| Redox couple                                                                   | Kinetic rate constant $k$ [cm s <sup>-1</sup> ] | Concentration of redox species [mM] | Supporting electrolyte             | Electrode         | Ref.      |
|--------------------------------------------------------------------------------|-------------------------------------------------|-------------------------------------|------------------------------------|-------------------|-----------|
| V <sup>2+</sup> /V <sup>3+</sup>                                               | $2.2 \times 10^{-5}$ @ 298 K                    | 50                                  | 1 M H <sub>2</sub> SO <sub>4</sub> | PFC <sup>1)</sup> | 1         |
| VO <sub>2</sub> <sup>+</sup> /VO <sup>2+</sup>                                 | $6.8 \times 10^{-5}$ @ 298 K                    | 50                                  | 0.5 M HClO <sub>4</sub>            | GC <sup>2)</sup>  | 1         |
| Fe <sup>2+</sup> /Fe <sup>3+</sup>                                             | $2.2 \times 10^{-5}$ @ 298 K                    | 40                                  | 0.5 M HClO <sub>4</sub>            | Au                | 2         |
| Fe <sup>2+</sup> /Fe <sup>3+</sup>                                             | $5 \times 10^{-3}$ @ 293 K                      | 1                                   | 1 M HClO <sub>4</sub>              | Pt                | 3         |
| [Fe(CN) <sub>6</sub> ] <sup>4-</sup> /<br>[Fe(CN) <sub>6</sub> ] <sup>3-</sup> | $9 \times 10^{-2}$ @ 293 K                      | 1                                   | 1 M KCl                            | Pt                | 3         |
| AQDS/AQDS <sup>2-</sup>                                                        | $7.2(5) \times 10^{-3}$                         | 1                                   | 1 M H <sub>2</sub> SO <sub>4</sub> | GC                | 4         |
| FMN <sup>3-</sup> /FMN <sup>5-</sup>                                           | $(5.8 \pm 0.6) \times 10^{-3}$<br>@ 298 K       | 10                                  | 1 M KOH                            | GC                | This work |

1) PFC: Plastic formed carbon, 2) GC: Glassy carbon

AQDS: 9,10-anthraquinone-2,7-disulphonic acid

**Supplementary Table 2 | Comparison of aqueous redox flow batteries based on organic active materials.**

| Active material (concentration)                  |                         | Energy Density <sup>1)</sup> [Wh L <sup>-1</sup> ] | Max. power density [W cm <sup>-2</sup> ] | Capacity retention (100 cycles) [%] | Ref.      |
|--------------------------------------------------|-------------------------|----------------------------------------------------|------------------------------------------|-------------------------------------|-----------|
| Positive                                         | Negative                |                                                    |                                          |                                     |           |
| TEMPO-polymer (N/A)                              | Viologen-polymer (N/A)  | ~3.6 <sup>2)</sup>                                 | N/A                                      | ~ 80                                | 5         |
| TEMPOL (0.5 M)                                   | Methyl-viologen (0.5 M) | ~ 4.7 <sup>3)</sup>                                | N/A                                      | ~85                                 | 6         |
| Bromide/bromine (3 M HBr/0.5 M Br <sub>2</sub> ) | AQDS (1 M)              | ~ 16 <sup>4)</sup>                                 | 1.0                                      | ~ 100                               | 4,7,8     |
| K <sub>4</sub> [Fe(CN) <sub>6</sub> ] (0.4 M)    | DHAQ (0.5 M)            | N/A <sup>5)</sup>                                  | 0.40                                     | ~ 90                                | 9         |
| K <sub>4</sub> [Fe(CN) <sub>6</sub> ] (0.4 M)    | FMN-Na (0.24 M)         | 4.8                                                | 0.16                                     | ~99                                 | This work |

1) Measured energy density was calculated from the capacity (Ah L<sup>-1</sup>) and average discharge voltage. Volume is based on the total volume of positive and negative electrolytes.

2) Capacity: (10 Ah L<sup>-1</sup> × 10 mL)/(10 mL + 15 mL) = 4 Ah L<sup>-1</sup>; average discharge voltage: *ca.* 0.9 V.

3) Capacity: (10.5 Ah L<sup>-1</sup>)/2 = 5.3 Ah L<sup>-1</sup>; average discharge voltage: *ca.* 0.9 V.

4) 40 °C. Capacity: 26.8 Ah L<sup>-1</sup>; average discharge voltage: *ca.* 0.6 V.

5) 45 °C. The only normalized capacity was shown in ref 9.

TEMPOL: 4-hydroxy-2,2,6,6-tetramethyl-1-piperidinyloxy,

AQDS: 9,10-anthraquinone-2,7-disulphonic acid ,

DHAQ: 2,6-dihydroxyanthraquinone.

## Supplementary References

- 1 Yamamura, T., Watanabe, N., Yano, T. & Shiokawa, Y. Electron-transfer kinetics of  $\text{Np}^{3+}/\text{Np}^{4+}$ ,  $\text{NpO}_2^{2+}/\text{NpO}_2^{2+}$ ,  $\text{V}^{2+}/\text{V}^{3+}$ , and  $\text{VO}_2^{+}/\text{VO}^{2+}$  at carbon electrodes. *J. Electrochem. Soc.* **152**, A830-A836 (2005).
- 2 Weber, A. Z. *et al.* Redox flow batteries: a review. *J. Appl. Electrochem.* **41**, 1137-1164 (2011).
- 3 Randles, J. E. B. & Somerton, K. W. Kinetics of rapid electrode reactions. Part 3. Electron exchange reactions. *Trans. Faraday Soc.* **48**, 937-950 (1952).
- 4 Huskinson, B. *et al.* A metal-free organic-inorganic aqueous flow battery. *Nature* **505**, 195-198 (2014).
- 5 Janoschka, T. *et al.* An aqueous, polymer-based redox-flow battery using non-corrosive, safe, and low-cost materials. *Nature* **527**, 78-81 (2015).
- 6 Liu, T. B., Wei, X. L., Nie, Z. M., Sprenkle, V. & Wang, W. A total organic aqueous redox flow battery employing a low cost and sustainable methyl viologen anolyte and 4-HO-TEMPO catholyte. *Adv. Energy Mater.* **6**, 1501449 (2016).
- 7 Chen, Q., Gerhardt, M. R., Hartle, L. & Aziz, M. J. A quinone-bromide flow battery with 1  $\text{W}/\text{cm}^2$  power density. *J. Electrochem. Soc.* **163**, A5010-A5013 (2016).
- 8 Huskinson, B., Marshak, M. P., Gerhardt, M. R. & Aziz, M. J. Cycling of a quinone-bromide flow battery for large-scale electrochemical energy storage. *ECS Trans.* **61**, 27-30 (2014).
- 9 Lin, K. X. *et al.* Alkaline quinone flow battery. *Science* **349**, 1529-1532 (2015).
